# Supplementary material
Source: PubMed Central journal article supplement (PMC6386812)

Study ID 1

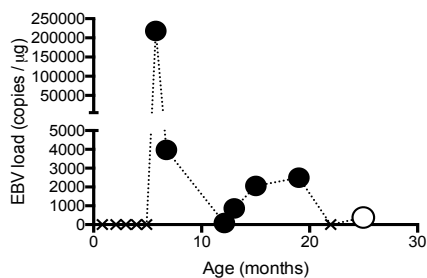

Study ID 2

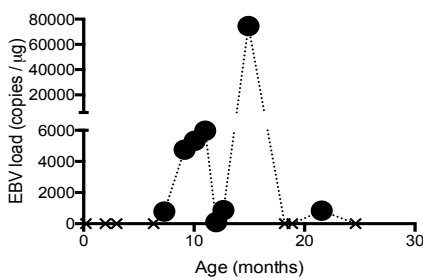

Study ID 3

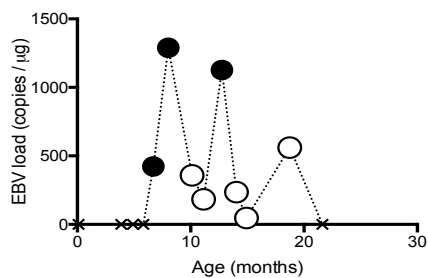

Study ID 4

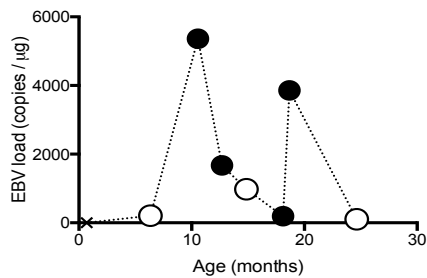

Study ID 5

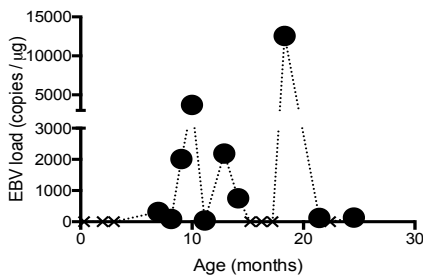

Study ID 6

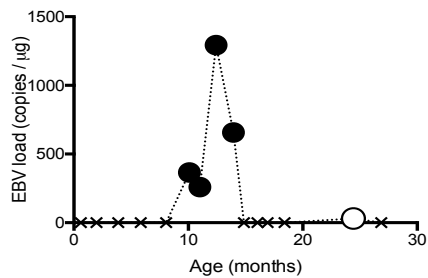

Study ID 7

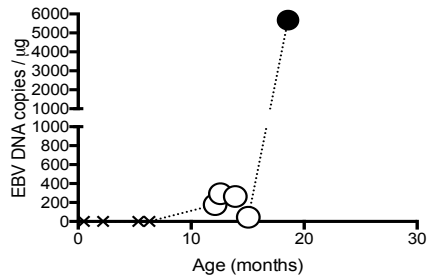

Study ID 8

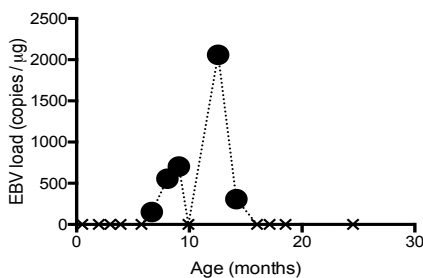

Study ID 9

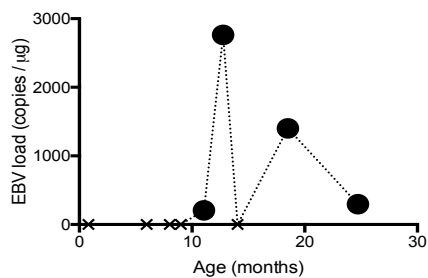

Study ID 10

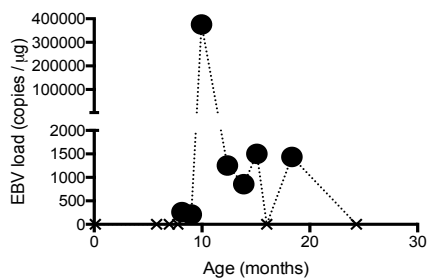

Study ID 11

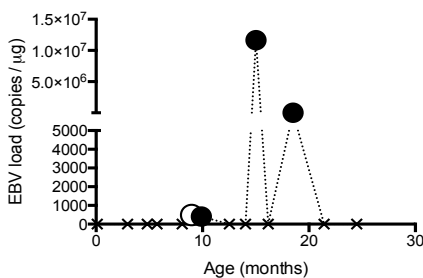

Study ID 12

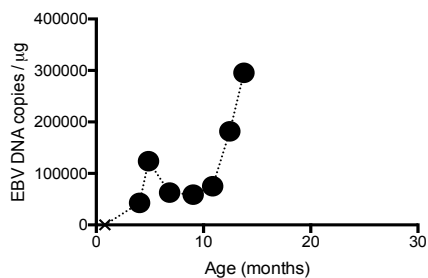

Study ID 13

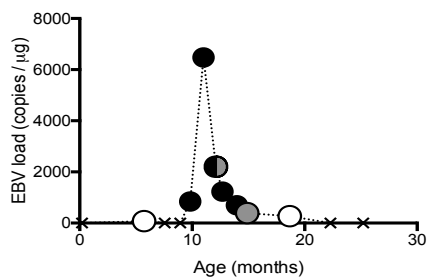

Study ID 14

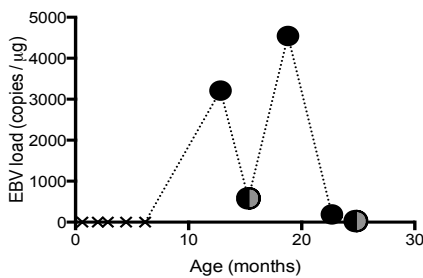

Study ID 15

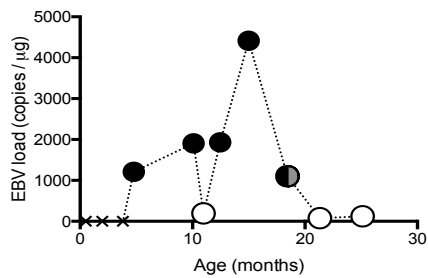

Study ID 16

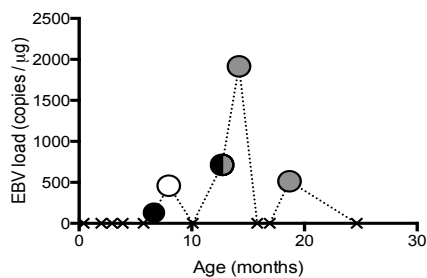

Study ID 17

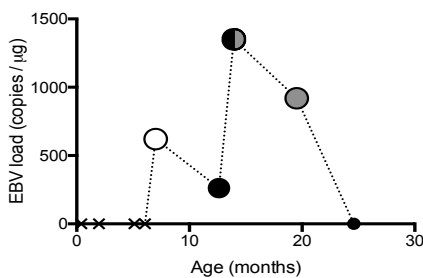

Study ID 18

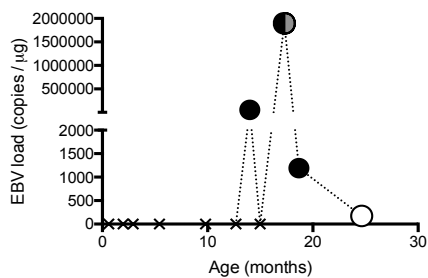

Supplement: jiy601_suppl_supplementary_figure_2a.pdf [file jiy601_suppl_supplementary_figure_2a.pdf]
