# Supplementary material
Source: PubMed Central journal article supplement (PMC6386812)

Single Infection gp350-IgA

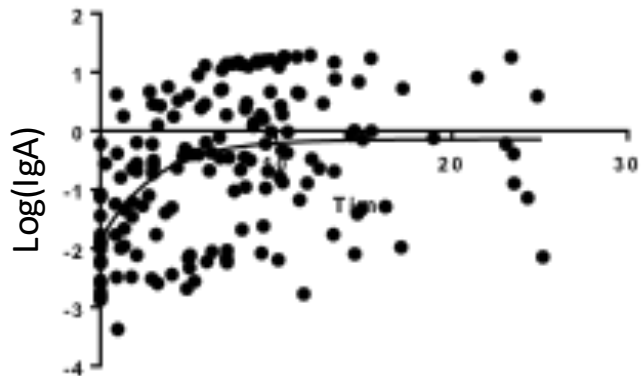

Co-infection gp350-IgA

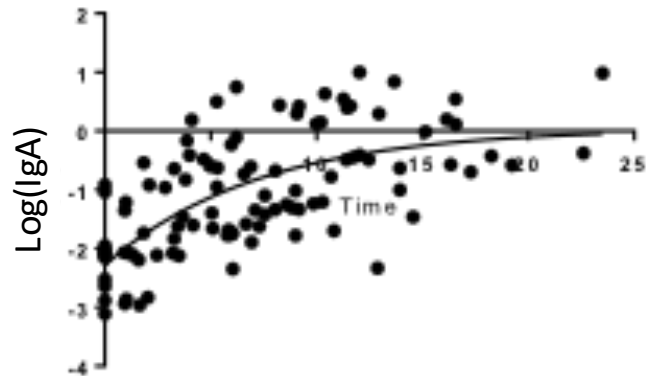

Single Infection gp350-IgG

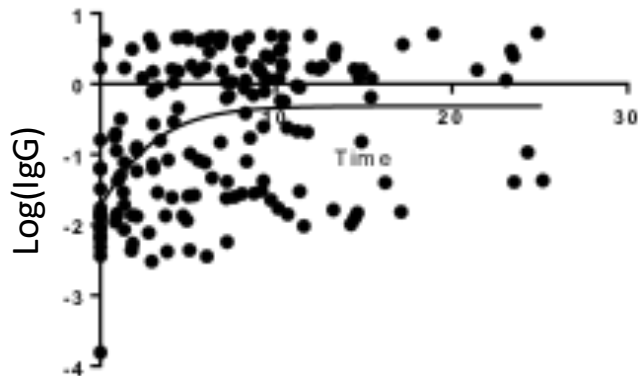

Co-infection gp350-IgG

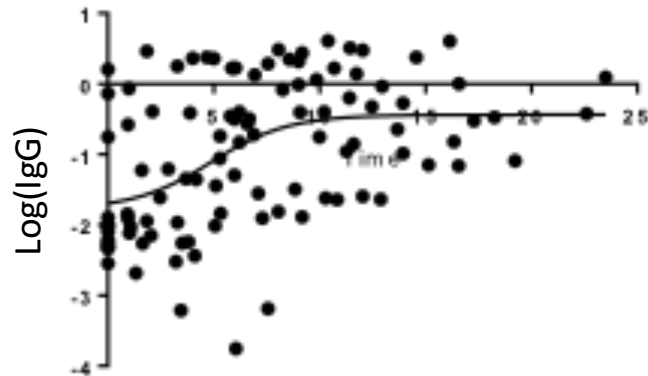

Supplement: jiy601_suppl_supplementary_figure_1.pdf [file jiy601_suppl_supplementary_figure_1.pdf]
